# Supplementary material for: Parasites of Free-Ranging and Captive American Primates: A Systematic Review
Source: MDPI journal article supplement (doi:10.3390/microorganisms9122546), 2021-12-09
Supplement: s1 [file s1]

## Supplementary File S1: parasite – host list

### Parasites of free-ranging and captive Neotropical primates: A systematic review

#### Parasite - host list

Including reports from molecular and morphological diagnostic methods, and excluding others (Serology, ELISA, indirect ELISA, indirect agglutination assays, western blood IgG assays, immunochromatographic assays, sero K-SeT rapid diagnostic tests, indirect immunofluorescence assays, immunohistochemical assays, antigen-based rapid diagnostic tests, TESA-blot).

---

#### Endoparasites

##### PROTOZOA Owen, 1858

##### Family Balantidiidae Doflein and Reichenow, 1929

*Balantidium* sp. Claparède & Lachmann, 1858

*Alouatta palliata*, Ecuador [1]

*Balantidium coli* Stein, 1863

*Alouatta seniculus*, Colombia\* [2]

\*Records from captive primates.

*Balantioides* sp. Alexeieff, 1931

*Aotus nigriceps*, Peru [3]

##### Family Blastocystidae Jiang and He, 1993

*Blastocystis* sp. Jaekel, 1918

*Alouatta* sp., Colombia [4]

*Alouatta caraya*, Brazil\* [5]

*Alouatta caraya*, Argentina\* [6]

*Alouatta guariba*, Brazil\* [5]

*Alouatta palliata*, Mexico [7]

*Alouatta palliata*, Ecuador [1]

*Alouatta pigra*, Mexico [7]

*Alouatta seniculus*, Brazil\* [5]

*Ateles belzebuth*, Brazil\* [5]

*Ateles fusciceps*, Brazil\* [5]

*Ateles paniscus*, China\* [8]

*Callithrix jacchus*, Brazil\* [5]

*Lagothrix lagotricha*, Brazil\* [5]

*Leontopithecus chrysomelas*, Brazil\* [5]

*Mico argentatus*, Brazil\* [5]

*Saimiri sciureus*, China\* [8]

*Sapajus apella*, Brazil\* [5]

\*Records from captive primates.

*Blastocystis hominis* Brumpt, 1912

*Alouatta caraya*, Argentina\* [6]

*Alouatta caraya*, Argentina [6]

\*Records from captive primates.

#### **Family Cryptosporidiidae Léger 1911**

*Cryptosporidium* sp. Tyzzer, 1907

*Alouatta caraya*, Argentina\* [6]

*Callicebus nigrifrons*, Brazil\* [9]

*Lagothrix flavicauda*, Peru [10]

\*Records from captive primates.

*Cryptosporidium parvum* Tyzzer, 1912

*Ateles paniscus*, Brazil\* [11]

*Callithrix* sp., Brazil\* [11]

\*Records from captive primates.

#### **Family Eimeriidae Minchin, 1903**

*Cyclospora* sp. Schneider, 1881

*Alouatta palliata*, Ecuador [1]

*Eimeria* sp. Schneider, 1875

*Alouatta caraya*, Argentina [12]

*Isospora* sp. Schneider, 1881

*Alouatta palliata*, Ecuador [1]

**Family Endolimacidae** Cavalier-Smith, 2004

*Endolimax* sp. Kuenen and Swellengrebel, 1913

*Saguinus leucopus*, Colombia [13]

*Endolimax nana* Wenyon and O'connor, 1917

*Alouatta seniculus*, Colombia\* [2]

\*Records from captive primates.

*Iodamoeba* sp. Dobell, 1919

*Alouatta palliata*, Ecuador [1]

**Family Entamoebidae** Chatton, 1925

*Lagothrix lagotricha*, Colombia [14]

*Lagothrix lagotricha*, Colombia\* [14]

\*Records from captive primates.

*Entamoeba* sp. Casagradi and Barbagallo, 1895

*Alouatta palliata*, Ecuador [1]

*Alouatta palliata*, Mexico [15]

*Alouatta pigra*, Mexico [15]

*Aotus nigriceps*, Peru [3]

*Saguinus leucopus*, Colombia [13]

*Entamoeba coli* Grasii, 1879

*Alouatta caraya*, Argentina\* [12]

*Alouatta caraya*, Argentina [12]

*Alouatta caraya*, Argentina [6]

*Alouatta pigra*, Mexico [16]

*Alouatta seniculus*, Colombia\* [2]

*Aotus* sp., Colombia\* [2]

*Cebus albifrons*, Colombia\* [2]

*Lagothrix flavicauda*, Peru [10]

\*Records from captive primates.

*Entamoeba histolytica* Schaudinn, 1903

*Alouatta seniculus*, Colombia\* [2]

*Aotus* sp., Colombia\* [2]

*Cebus albifrons*, Colombia\* [2]

\*Records from captive primates.

*Entamoeba histolytica/dispar/moskovskii/nuttalli*

*Cebus albifrons*, Ecuador\* [17]

\*Records from captive primates.

*Entamoeba* sp. / *Endolimax* sp.

*Alouatta palliata*, Costa Rica [18]

## **Family Giardiidae** Kulda and Nohýnková, 1978

*Giardia* sp. Ancey, 1910

*Alouatta caraya*, Brazil\* [19]

*Alouatta guariba*, Brazil\* [19]

*Alouatta palliata*, Costa Rica [20]

*Aotus trivirgatus*, Brazil\* [19]

*Ateles* sp., Brazil\* [19]

*Brachyteles arachnoides*, Brazil\* [19]

*Callithrix penicillata*, Brazil\* [19]

*Cebus kaapori*, Brazil\* [19]

*Lagothrix lagotricha*, Brazil\* [19]

*Leontopithecus chrysopygus*, Brazil\* [19]

*Leontopithecus rosalia*, Brazil\* [19]

*Saimiri sciureus*, Colombia\* [21]

\*Records from captive primates.

*Giardia duodenalis* Kulda and Nohýnková, 1995

*Alouatta caraya*, Argentina [22]

*Giardia lamblia* Kulda and Nohýnková, 1995

*Alouatta caraya*, Argentina\* [12]

*Alouatta caraya*, Argentina [12]

*Alouatta caraya*, Argentina\* [6]

\*Records from captive primates.

#### **Family Dientamoebidae** Grasse, 1953

*Dientamoeba* sp. Jepps & Dobell, 1918

*Alouatta palliata*, Ecuador [1]

#### **Family Plasmodiidae** Mesnil, 1903

*Plasmodium* sp. Marchiafava and Celli, 1885

*Alouatta guariba*, Brazil [23]

*Callithrix jacchus*, Brazil\* [24]

*Callithrix jacchus*, Brazil\* [25]

*Sapajus* sp., Brazil\* [24]

*Sapajus* sp., Brazil\* [25]

*Sapajus flavius*, Brazil [26]

\*Records from captive primates.

*Plasmodium brasilianum* Gonder and von Berenberg-Gossler, 1908

*Alouatta belzebul*, Brazil [27]

*Alouatta caraya*, Brazil [27]  
*Alouatta guariba*, Brazil [27]  
*Alouatta guariba*, Brazil [23]  
*Alouatta seniculus*, Brazil [27]  
*Ateles chamek*, Brazil [27]  
*Ateles paniscus*, Brazil [27]  
*Cacajao calvus*, Brazil [27]  
*Callithrix geoffroyi*, Brazil\* [28]  
*Cheracebus torquatus*, Brazil [27]  
*Chiropotes albinasus*, Brazil [27]  
*Chiropotes chiropotes*, Brazil [27]  
*Chiropotes satanas*, Brazil [27]  
*Lagothrix cana*, Brazil [27]  
*Lagothrix lagotricha*, Brazil [27]  
*Leontopithecus chrysomelas*, Brazil\* [28]  
*Leontopithecus rosalia*, Brazil\* [28]  
*Mico humeralifer*, Brazil\* [28]  
*Pithecia monachus*, Brazil [27]  
*Pithecia pithecia*, Brazil [27]  
*Plecturocebus brunneus*, Brazil [27]  
*Plecturocebus moloch*, Brazil [27]  
*Saguinus fuscicollis*, Peru [29]  
*Saguinus imperator*, Peru [29]  
*Saguinus martinsi*, Brazil\* [28]  
*Saguinus midas*, Brazil [27]  
*Saimiri boliviensis*, Brazil [27]  
*Saimiri sciureus*, Brazil [27]  
*Saimiri ustus*, Brazil [27]

*Sapajus apella*, Brazil [27]

*Sapajus macrocephalus*, Brazil [27]

\*Records from captive primates.

*Plasmodium falciparum* Welch 1897

*Alouatta seniculus*, Colombia [30]

\*Records from captive primates.

*Plasmodium malariae* Feletti and Grassi, 1889

*Aotus infulatus*, Brazil\* [25]

*Callithrix jacchus*, Brazil\* [25]

*Chiropotes satanas*, Brazil\* [25]

*Saguinus midas*, Brazil\* [25]

*Sapajus* sp., Brazil [25]

\*Records from captive primates.

*Plasmodium malariae/brasilianum*

*Alouatta guariba*, Brazil [23]

*Alouatta guariba*, Brazil [31]

*Alouatta seniculus*, Colombia [30]

*Aotus griseimembra*, Colombia [30]

*Ateles hybridus*, Colombia [30]

*Cebus versicolor*, Colombia [30]

*Sapajus* sp., Brazil\* [24]

*Sapajus* sp., Brazil [24]

\*Records from captive primates.

*Plasmodium simium* Da Fonseca 1951

*Alouatta guariba*, Brazil [23]

*Alouatta guariba*, Brazil [32]

*Alouatta guariba*, Brazil\* [33]

*Alouatta guariba*, Brazil\* [34]

*Brachyteles arachnoides*, Brazil [27]

\*Records from captive primates.

*Plasmodium vivax/simium*

*Alouatta* sp., Brazil [35]

*Alouatta guariba*, Brazil [31]

*Alouatta seniculus*, Colombia [30]

*Ateles hybridus*, Colombia [30]

*Cebus versicolor*, Colombia [30]

### **Family Chilomastigidae** Cavalier-Smith 2013

*Chilomastix* sp. Alexeieff, 1910

*Alouatta palliata*, Ecuador [1]

### **Family Sarcocystidae** Poche, 1913

*Toxoplasma* sp. Nicolle and Manceaux, 1909

*Alouatta* sp., Brazil\* [36]

*Saimiri sciureus*, South Korea\* [37]

*Saimiri sciureus*, Japan\* [38]

\*Records from captive primates.

*Toxoplasma gondii* Nicolle and Manceaux, 1908

*Alouatta* sp., Brazil\* [36]

*Saimiri sciureus*, Colombia\* [21]

*Saimiri sciureus*, South Korea\* [37]

*Saimiri sciureus*, Japan\* [38]

\*Records from captive primates.

### **Family Trichomonadidae** Chalmers and Pekkola, 1918

*Tetratrichomonas* sp. Parisi, 1910



*Alouatta sara*, Brazil\* [39]

*Callithrix penicillata*, Brazil\* [39]

*Sapajus apella*, Brazil\* [39]

\*Records from captive primates.

*Trichomonas* sp. Donné, 1836

*Alouatta palliata*, Costa Rica [20]

### **Family Trypanosomatidae** Ross, 1903

*Alouatta seniculus*, Peru\* [40]

*Alouatta seniculus*, Peru [40]

*Aotus* sp., Peru\* [40]

*Ateles belzebuth*, Peru\* [40]

*Ateles chamek*, Peru [40]

*Cacajao calvus*, Peru [40]

*Cebus albifrons*, Peru [40]

*Lagothrix cana*, Peru\* [40]

*Lagothrix lagotricha*, Peru\* [40]

*Lagothrix poeppigii*, Peru\* [40]

*Pithecia monachus*, Peru [40]

*Plecturocebus cupreus*, Peru [40]

*Saimiri boliviensis*, Peru\* [40]

*Saimiri boliviensis*, Peru [40]

*Saimiri sciureus*, Peru\* [40]

*Saimiri sciureus*, Peru [40]

*Sapajus macrocephalus*, Peru\* [40]

*Sapajus macrocephalus*, Peru [40]

\*Records from captive primates

*Leishmania* sp. Ross, 1903

*Alouatta seniculus*, French Guiana [41]

*Sapajus cay*, Brazil [42]

*Leishmania amazonensis* Lainson & Shaw, 1972

*Alouatta caraya*, Argentina [43]

*Leishmania braziliensis* Vianna, 1911

*Aotus trivirgatus*, Panama [44]

*Saguinus geoffroyi*, Panama [44]

*Alouatta caraya*, Argentina [43]

*Leishmania braziliensis/ infantum/amazonensis*

*Callithrix* sp., Brazil [45]

*Leishmania guyanensis* Floch, 1954

*Alouatta seniculus*, French Guiana [41]

*Leishmania infantum* Nicolle, 1908

*Alouatta caraya*, Argentina [43]

*Alouatta guariba*, Brazil\* [46]

\*Records from captive primates

*Leishmania shawi* Lainson et al. 1989

*Sapajus apella*, Brazil [47]

*Trypanosoma* sp. Gruby, 1843

*Callithrix geoffroyi*, Brazil [48]

*Saguinus leucopus*, Colombia [13]

\*Records from captive primates

*Trypanosoma cruzi* Chagas, 1909

*Aotus azarae*, Brazil\* [49]

*Ateles paniscus*, Brazil\* [49]

*Cebus albifrons*. Peru [40]

*Cebus olivaceus*, Brazil\* [49]

*Lagothrix cana*, Brazil\* [49]

*Lagothrix poeppigii*, Peru [40]  
*Pithecia monachus*, Brazil\* [49]  
*Plecturocebus oenanthe*, Peru [40]  
*Saguinus midas*, Brazil\* [49]  
*Saimiri boliviensis*, Peru [40]  
*Saimiri sciureus*, Peru\* [40]  
*Saimiri sciureus*, Brazil\* [49]  
*Saimiri sciureus*, Peru [40]  
*Saimiri ustus*, Brazil\* [49]  
*Sapajus* sp., Brazil\* [49]  
*Sapajus apella*, Brazil\* [49]  
*Sapajus macrocephalus*, Peru [40]  
*Sapajus macrocephalus*, Peru\* [40]

\*Records from captive primates

*Trypanosoma minasense* Chagas, 1908

*Callithrix geoffroyi*, Brazil [48]  
*Callithrix penicillata*, Brazil [50]

---

## **ANIMALIA Linnaeus, 1758**

### **Phylum Nematoda Rudolphi, 1808**

*Saguinus leucopus*, Colombia [13]  
*Sapajus flavius*, Brazil [26]

### **Family Ancylostomatidae Looss, 1905**

*Saguinus leucopus*, Colombia [13]  
*Ancylostoma* sp. Dubini, 1843  
*Lagothrix flavicauda*, Peru [10]  
*Saimiri sciureus*, Colombia\* [21]

\*Records from captive primates.

**Family Ascarididae** Baird, 1853

*Aotus nigriceps*, Peru [3]

*Lagothrix lagotricha*, Colombia [14]

*Ascaris* sp. Linnaeus, 1758

*Alouatta guariba*, Brazil [51]

*Saguinus leucopus*, Colombia [13]

*Sapajus nigratus*, Argentina [52]

*Ascaris lumbricoides* Linnaeus, 1758

*Alouatta seniculus*, Colombia\* [2]

\*Records from captive primates.

**Family Capillariidae** Neveu-Lemaire, 1936

*Capillaria* sp. Zeder, 1800

*Lagothrix flavicauda*, Peru [10]

*Alouatta palliata*, Ecuador [1]

*Cebus albifrons*, Ecuador [53]

**Family Filaroididae** Schulz, 1951

*Filariopsis* sp. Van Thiel, 1926

*Sapajus nigratus*, Argentina [52]

**Family Gongylonematidae** Hall, 1916

*Saguinus weddelli*, Peru [54]

*Saguinus imperator*, Peru [54]

*Gongylonema* sp. Molin, 1857

*Callithrix geoffroyi*, Brazil [55]

**Family Habronematidae** Ivaschkin, 1961

*Parabronema* sp. Baylis, 1921

*Alouatta pigra*, Mexico [56]

**Family Metastrongylidae** Leiper, 1909

*Saguinus leucopus*, Colombia [13]

**Family Molineidae** Skrjabin and Schulz, 1937

*Molineus torulosus* Molin 1861

*Sapajus apella*, Brazil\* [57]

*Sapajus flavius*, Brazil\* [57]

*Sapajus libidinosus*, Brazil\* [57]

\*Records from captive primates.

**Family Onchocercidae** Leiper, 1911

*Alouatta macconnelli*, French Guiana [58]

*Brugia* sp. Buckley, 1960

*Alouatta macconnelli*, French Guiana [58]

*Dipetalonema freitasi* Bain, Diagne & Muller, 1987

*Cacajao calvus*, Peru [59]

*Dipetalonema gracile* Rudolphi, 1809

*Lagothrix poeppigii*, Peru [60]

*Pithecia monachus*, Peru [59]

*Saimiri sciureus*, China\* [61]

\*Records from captive primates.

*Mansonella* sp. Faust, 1929

*Alouatta macconnelli*, French Guiana [58]

**Family Oxyuridae** Cobbold, 1864

*Lagothrix lagotricha*, Colombia [14]

*Lagothrix lagotricha*, Colombia\* [14]

*Saimiri sciureus*, Colombia [21]

\*Records from captive primates.

*Enterobius* sp. Leach, 1853

*Alouatta palliata*, Ecuador [1]

*Enterobius vermicularis* Linnaeus, 1758

*Alouatta seniculus*, Colombia\* [2]

*Cebus albifrons*, Colombia\* [2]

\*Records from captive primates.

*Trypanoxyuris* sp. Vevers, 1923

*Alouatta guariba*, Brazil [51]

*Alouatta palliata*, Costa Rica [18]

*Alouatta palliata*, Ecuador [1]

*Alouatta pigra*, Mexico [62]

*Alouatta pigra*, Mexico [56]

*Aotus nigriceps*, Peru [3]

*Leontopithecus chrysomelas*, Brazil [63]

*Trypanoxyuris atelis* Cameron, 1929

*Ateles geoffroyi*, Mexico [64]

*Ateles geoffroyi*, Mexico [65]

*Ateles geoffroyi*, Mexico\* [65]

*Ateles geoffroyi*, Costa Rica [64]

\*Records from captive primates.

*Trypanoxyuris atelophora* Kreis, 1932

*Ateles geoffroyi*, Mexico [64]

*Ateles geoffroyi*, Costa Rica [64]

*Trypanoxyuris callithricis* Solomon, 1933

*Callithrix* sp., Brazil [66]

*Trypanoxyuris kemuimae* Solórzano-García, Link Ospina, Rondón & Pérez-Ponce de León, 2020

*Alouatta seniculus*, Colombia [67]

*Trypanoxyuris kotudo* Solórzano-García, Link Ospina, Rondón & Pérez-Ponce de León, 2020

*Alouatta seniculus*, Colombia [67]

*Trypanoxyuris minutus* Schneider, 1866

*Alouatta* sp., Mexico [65]

*Alouatta guariba*., Brazil [66]

*Alouatta guariba*., Brazil [68]

*Alouatta palliata*, Costa Rica [64]

*Alouatta palliata*, Mexico [64]

*Alouatta palliata*, Nicaragua [64]

*Trypanoxyuris multilabiat* Solórzano-García *et al.*, 2016

*Alouatta palliata*, Costa Rica [64]

*Alouatta palliata*, Mexico [64]

*Alouatta palliata*, Nicaragua [64]

*Trypanoxyuris seunimii* Solórzano-García, Link Ospina, Rondón & Pérez-Ponce de León, 2020

*Alouatta seniculus*, Colombia [67]

#### **Family Physalopteridae** Railliet, 1893

*Sapajus nigr*itus, Argentina [52]

*Physaloptera* sp. Rudolphi, 1819

*Sapajus nigr*itus, Brazil [66]

#### **Family Rictulariidae** Railliet, 1916

*Pterygodermatites nycticebi* Mönnig, 1926

*Callimico* sp., Switzerland\* [69]

\*Records from captive primates.

**Family Spiruridae** Oerley, 1885

*Leontopithecus chrysomelas*, Brazil [63]

*Saguinus leucopus*, Colombia [13]

**Family Strongylidae** Baird, 1853

*Aotus nigriceps*, Peru [3]

*Lagothrix lagotricha*, Colombia [14]

*Lagothrix lagotricha*, Colombia\* [14]

\*Records from captive primates.

“Strongyles”

*Cebus albifrons*, Ecuador [53]

**Family Strongyloidea** Chitwood and McIntosh, 1934

*Strongyloides* sp. Grassi, 1879

*Alouatta caraya*, Argentina [70]

*Alouatta palliata*, Costa Rica [18]

*Alouatta palliata*, Ecuador [1]

*Alouatta seniculus*, Colombia\* [2]

*Aotus nigriceps*, Peru [3]

*Cebus albifrons*, Ecuador [53]

*Cebus albifrons*, Ecuador\* [53]

*Lagothrix flavicauda*, Peru [10]

*Saguinus leucopus*, Colombia [13]

*Saimiri sciureus*, Colombia\* [21]

*Sapajus nigritus*, Argentina [52]

\*Records from captive primates.

*Strongyloides cebus* Darling, 1911



*Lagothrix flavicauda*, Peru [10]

*Strongyloides stercoralis* Bavay, 1876

*Pithecia monachus*, Peru\* [71]

\*Records from captive primates.

**Family Subuluridae** Yorke and Maplestone, 1926

*Sapajus nigrinus*, Argentina [52]

*Primasubulura* sp. Inglis, 1958

*Callithrix* sp., Brazil [66]

*Leontopithecus chrysomelas*., Brazil [63]

*Saguinus imperator*, Peru [54]

*Saguinus weddelli*, Peru [54]

**Family Trichinellidae** Ward, 1907

*Lagothrix lagotricha*, Colombia\* [14]

\*Records from captive primates.

**Family Trichostrongylidae** Leiper 1912

*Lagothrix lagotricha*, Colombia\* [14]

\*Records from captive primates.

*Trichostrongylus* sp. Looss, 1905

*Saguinus leucopus*, Colombia [13]

**Family Trichuridae** Railliet, 1915

*Trichuris* sp. Roederer, 1761

*Sapajus nigrinus*, Argentina [52]

---

**ANIMALIA** Linnaeus, 1758

**Phylum Acanthocephala** Kohlreuther, 1771

**Family Oligacanthorhynchidae** Southwell and Macfie, 1925

*Pachysentis* sp. Meyer, 1931

*Alouatta guariba*, Brazil [66]

*Callithrix* sp., Brazil [66]

*Prosthenorchis* sp. Travassos, 1915

*Leontopithecus chrysomelas*, Brazil [66]

*Leontopithecus chrysomelas*, Brazil [63]

*Saguinus imperator*, Peru [54]

*Saguinus leucopus*, Colombia [13]

*Saguinus weddelli*, Peru [54]

*Sapajus nigratus*, Brazil [66]

*Prosthenorchis elegans* Diesing, 1851

*Callithrix geoffroyi*, Brazil [72]

*Cebus albifrons*, Ecuador\* [53]

*Lagothrix flavicauda*, Peru [10]

*Saimiri sciureus*, Colombia\* [21]

\*Records from captive primates.

---

**ANIMALIA Linnaeus, 1758**

**Phylum Platyhelminthes Minot, 1876**

**Class Cestoda Rudolphi, 1808**

*Lagothrix lagotricha*, Colombia [14]

*Leontopithecus rosalia*, Brazil [66]

*Saguinus imperator*, Peru [54]

*Saguinus weddelli*, Peru [54]

**Family Anoplocephalidae** Cholodkovsky, 1902

*Bertiella* sp. Stiles and Hassall, 1902

*Alouatta caraya*, Paraguay [73]

*Alouatta caraya*, Argentina\* [6]

*Alouatta guariba*, Brazil [66]

*Alouatta guariba*, Brazil [51]

\*Records from captive primates.

*Bertiella mucronata* Meyner, 1895

*Alouatta caraya*, Argentina [70]

*Alouatta caraya*, Argentina\* [70]

\*Records from captive primates.

*Paratriotaenia oedipomidatis* Linn, 1758

*Lagothrix flavicauda*, Peru [10]

#### **Family Hymenolepididae** Ariola, 1899

*Sapajus nigritus*, Argentina [52]

*Hymenolepis* sp. Kaulfuss, 1824

*Cebus albifrons*, Ecuador [53]

#### **Family Mesocestoididae** Fuhrmann, 1907

*Mesocestoides* sp. Vaillant, 1863

*Saguinus midas*, Italy\* [74]

\*Records from captive primates.

---

### **ANIMALIA Linnaeus, 1758**

#### **Phylum Platyhelminthes** Minot, 1876

#### **Class Trematoda** Rudolphi, 1808

*Alouatta pigra*, Mexico [56]

*Aotus nigriceps*, Peru [3]

*Sapajus nigritus*, Argentina [52]

**Family Dicrocoeliidae** Odhner, 1910

*Alouatta pigra*, Mexico [62]

*Saguinus imperator*, Peru [54]

*Saguinus weddelli*, Peru [54]

*Controrchis* sp. Price, 1928

*Alouatta palliata*, Costa Rica [18]

*Alouatta palliata*, Ecuador [1]

*Alouatta pigra*, Mexico [62]

*Controrchis biliophilus* Price, 1928

*Alouatta pigra*, Mexico [56]

*Platynosomum* sp. Looss, 1907

*Callithrix* sp., Brazil [66]

*Callithrix geoffroyi*, Brazil [55]

*Sapajus nigratus*, Brazil [66]

*Platynosomum illiciens* Braun, 1901

*Callithrix penicillata*, Brazil\* [75]

*Callithrix penicillata*, Brazil\* [76]

\*Records from captive primates.

---

**Ectoparasites**

**ANIMALIA Linnaeus, 1758**

**Family Ixodidae** Dugès, 1834

*Amblyomma aureolatum* Pallas, 1772

*Alouatta guariba*, Brazil\* [77]

\*Records from captive primates.

*Amblyomma dubitatum* Neumann, 1899

*Alouatta guariba*, Brazil\* [77]

\*Records from captive primates.

*Amblyomma parkeri* Fonseca & Aragao, 1952

*Alouatta guariba*, Brazil\* [77]

*Callicebus nigrifrons*, Brazil\* [77]

\*Records from captive primates.

*Amblyomma romarioi* Martins, Luz & Labruna, 2019

*Callicebus nigrifrons*, Brazil\* [78]

\*Records from captive primates.

*Amblyomma sculptum* Berlese, 1888

*Alouatta guariba*, Brazil [79]

*Alouatta guariba*, Brazil\* [77]

\*Records from captive primates.

*Rhipicephalus microplus* Canestrini, 1888

*Alouatta seniculus*, Brazil [80]

#### **Family Oestridae** Leach, 1815

*Cuterebra baeri* Shannon and Greenem, 1926

*Aotus nancymae*, Colombia [81]

*Aotus vociferans*, Colombia [81]

#### **Family Trichodectidae** Kellogg, 1896

*Cebidicola semiarmatus* Neumann, 1913

*Alouatta guariba*, Brazil [82]

#### **Family Hectopsyllidae** Baker, 1904

*Tunga penetrans* Linnaeus, 1758

*Alouatta guariba*, Brazil [51]

## References

1. Helenbrook, W.D.; Stehman, S. V.; Shields, W.M.; Whipps, C.M. Association of Anthropogenic Disturbances and Intestinal Parasitism in Ecuadorian Mantled Howler Monkeys, *Alouatta palliata aequatorialis*. *Folia Primatol.* **2017**, *88*, 307–322, doi:10.1159/000479687.
2. de la Hoz, D.M.E.; Cañate González, A.S.; Vergel, E.F.; Payares Ramírez, K.J.; Morales López, S.E. Parasitic and fungal agents in *Aotus* sp., *Alouatta seniculus* and *Cebus albifrons* in the Colombian Caribbean. *Rev. Investig. Vet. del Peru* **2020**, *31*, doi:10.15381/RIVEP.V31I4.17632.
3. Helenbrook, W.D.; Nelson, A.; Paras, K.L.; Solorzano-Garcia, B. Intestinal Parasitism in Free-Ranging Black-Headed Night Monkeys, *Aotus nigriceps*, of Southeastern Peru. *Int. J. Primatol.* **2020**, *41*, 458–470, doi:10.1007/s10764-020-00146-7.
4. Ramírez, J.D.; Sánchez, L.V.; Bautista, D.C.; Corredor, A.F.; Flórez, A.C.; Stensvold, C.R. *Blastocystis* subtypes detected in humans and animals from Colombia. *Infect. Genet. Evol.* **2014**, *22*, 223–228, doi:10.1016/j.meegid.2013.07.020.
5. Oliveira-Arbex, A.P.; David, É.B.; Tenório, M. da S.; Cicchi, P.J.P.; Patti, M.; Coradi, S.T.; Lucheis, S.B.; Jim, J.; Guimarães, S. Diversity of *Blastocystis* subtypes in wild mammals from a zoo and two conservation units in southeastern Brazil. *Infect. Genet. Evol.* **2020**, *78*, doi:10.1016/j.meegid.2019.104053.
6. Servián, A.; Zonta, M.L.; Cociancic, P.; Falcone, A.; Ruybal, P.; Capasso, S.; Navone, G.T. Morphological and molecular characterization of *Bertiella* sp. (Cestoda, Anoplocephalidae) infection in a human and howler monkeys in Argentina. *Parasitol. Res.* **2020**, *119*, 1291–1300, doi:10.1007/s00436-020-06615-5.
7. Villanueva-Garcia, C.; Gordillo-Chavez, E.J.; Lopez-Escamilla, E.; Rendon-Franco, E.; Muñoz-Garcia, C.I.; Gama, L.; Martinez-Flores, W.A.; Gonzalez-Rodriguez, N.; Romero-Valdovinos, M.; Diaz-Lopez, H.; et al. Clarifying the Cryptic Host Specificity of *Blastocystis* spp. isolates from *Alouatta palliata* and *A. Pigra* Howler Monkeys. *PLoS One* **2017**, *12*, 1–15, doi:10.1371/journal.pone.0169637.
8. Ma, L.; Qiao, H.; Wang, H.; Li, S.; Zhai, P.; Huang, J.; Guo, Y. Molecular prevalence and subtypes of *Blastocystis* sp. in primates in northern China. *Transbound. Emerg. Dis.* **2020**, *67*, 2789–2796, doi:10.1111/tbed.13644.
9. Bofill, I.; Pereira de Souza, S.; Dias de Paula, F.; Gennari, S.; Quilez, J. *Cryptosporidium* spp. en *Callicebus nigrifrons*: reporte de un caso de diarrea aguda en un centro de rescate de primates del estado de São Paulo, Brasil. *Neotrop. Primates* **2018**, *24*, 72–75.
10. Reátegui Guzmán, E.H.; Piperis, R.E.; Cornejo Fernandez, F.M.; Quispe Huacho, M.A.; Tantaleán Vidaurre, M.E. Gastrointestinal parasites in wild yellow-tailed woolly monkey (*Lagothrix flavicauda*) in the Corosha district, Amazonas, Peru. *Rev. Investig. Vet. del Peru* **2020**, *31*, doi:10.15381/RIVEP.V31I4.19030.
11. Snak, A.; Da Silveira Delgado, L.E.; Osaki, S.C. *Cryptosporidium parvum* in captive primates of Parque Municipal Danilo Galafassi, Paraná, Brazil. *Semin. Agrar.* **2019**, *40*, 987–992, doi:10.5433/1679-0359.2019v40n2p987.
12. Milozzi, C.; Bruno, G.; Cundom, E.; Mudry, M.D.; Navone, G.T. Intestinal parasites of *Alouatta caraya* (Primates, Ceboidea): preliminary study in semi-captivity and in the wild in Argentina. *Mastozoología Neotrop.* **2012**, *19*, 271–278.
13. Acevedo-Garcés, Y.; Álvarez-Cardona, J.; Vargas-Valencia, V.; Hernández-Castro, C.; García-Montoya, G.; Soto-Calderón, I. Clinical and parasitological evaluation of White-footed Tamarins (Primates-Cebidae- *Saguinus leucopus*) from two free-range populations located in San Carlos and San Rafael (Antioquia, Colombia). *Rev. CES Med. Vet. y Zootec.* **2014**, *9*.

14. Quiroga-González, C.; Jiménez, E.; Galvis, N.F.; Ramírez, M.A.; Ortiz, M.; González, C.; Stevenson, P.R. First records of gastrointestinal parasites in woolly monkeys (*Lagothrix lagotricha*) in Colombia, from wild, captive and reintroduced individuals. *Neotrop. Primates* **2019**, *25*, 38–43.
15. Villanueva-García, C.; Gordillo-Chávez, E.J.; Baños-Ojeda, C.; Rendón-Franco, E.; Muñoz-García, C.I.; Carrero, J.C.; Córdoba-Aguilar, A.; Maravilla, P.; Galian, J.; Martínez-Hernández, F.; et al. New Entamoeba group in howler monkeys (*Alouatta* spp.) associated with parasites of reptiles. *Parasitol. Res.* **2017**, *116*, 2341–2346, doi:10.1007/s00436-017-5519-6.
16. Martínez-Mota, R.; Garber, P.A.; Palme, R.; Gillespie, T.R. The relative effects of reproductive condition, stress, and seasonality on patterns of parasitism in wild female black howler monkeys (*Alouatta pigra*). *Am. J. Primatol.* **2017**, *79*, doi:10.1002/ajp.22669.
17. Martin-Solano, S.; Carrillo-Bilbao, G.A.; Ramirez, W.; Celi-Erazo, M.; Huynen, M.C.; Levecke, B.; Benitez-Ortiz, W.; Losson, B. Gastrointestinal parasites in captive and free-ranging *Cebus albifrons* in the Western Amazon, Ecuador. *Int. J. Parasitol. Parasites Wildl.* **2017**, *6*, 209–218, doi:10.1016/j.ijppaw.2017.06.004.
18. Chinchilla Carmona, M.; Guerrero Bermúdez, O.; Gutiérrez-Espeleta, G.; Sánchez Porras, R.; Rodríguez Ortiz, B. Parásitos intestinales en monos congo *Alouatta palliata* (Primates: Cebidae) de Costa Rica. *Rev. Biol. Trop.* **2005**, *53*, 3–4.
19. Chagas, C.R.F.; Gonzalez, I.H.L.; Salgado, P.A.B.; Rodrigues, B.; Ramos, P.L. *Giardia* spp., ten years of parasitological data in the biggest zoo of Latin America. *Ann. Parasitol.* **2019**, *65*, 35–51, doi:10.17420/ap6501.181.
20. Chinchilla, M.; Guerrero, O.; Gutiérrez-Espeleta, G.; Porras, R.; Ortiz, B. Parásitos intestinales en monos congo *Alouatta palliata* (Primates: Cebidae) de Costa Rica. *Rev. Biol. Trop.* **2005**, *53*, 437–445.
21. Botero, L.; Fernández, A.; Forero, A.; Rosas, S.; Soler-Tovar, S. Análisis retrospectivo de las enfermedades parasitarias del mono ardilla (*Saimiri sciureus*) en dos condiciones ex situ en el noroccidente de los Andes suramericanos. *Rev. Med. Vet. (Bogotá)*. **2011**, *22*, 85–93.
22. Kuthyar, S.; Kowalewski, M.M.; Roellig, D.M.; Mallott, E.K.; Zeng, Y.; Gillespie, T.R.; Amato, K.R. Effects of anthropogenic habitat disturbance and *Giardia duodenalis* infection on a sentinel species' gut bacteria. *Ecol. Evol.* **2021**, *11*, 45–57, doi:10.1002/ece3.6910.
23. Abreu, F.V.S. de; Santos, E. Dos; Mello, A.R.L.; Gomes, L.R.; Alvarenga, D.A.M. de; Gomes, M.Q.; Vargas, W.P.; Bianco-Júnior, C.; Pina-Costa, A. de; Teixeira, D.S.; et al. Howler monkeys are the reservoir of malarial parasites causing zoonotic infections in the Atlantic forest of Rio de Janeiro. *PLoS Negl. Trop. Dis.* **2019**, *13*, e0007906, doi:10.1371/journal.pntd.0007906.
24. Figueiredo, M.A.P.; Di Santi, S.M.; Manrique, W.G.; André, M.R.; Machado, R.Z. Serological and molecular techniques applied for identification of *Plasmodium* spp. in blood samples from non human primates. *Rev. Bras. Parasitol. Vet.* **2018**, *27*, 363–376, doi:10.1590/s1984-296120180043.
25. Figueiredo, M.; Di Santi, S.; Gómez, W.; André, M.; Zacarias, R. Identification of *Plasmodium* spp. in Neotropical primates of Maranhense Amazon in Northeast Brazil. *PLoS One* **2017**, *12*, 1–14.
26. Bueno, M.G.; Catão-Dias, J.L.; de Oliveira Laroque, P.; Arruda Vasconcellos, S.; Ferreira Neto, J.S.; Gennari, S.M.; Ferreira, F.; Laurenti, M.D.; Umezawa, E.S.; Kesper, N.; et al. Infectious Diseases in Free-Ranging Blonde Capuchins, *Sapajus flavius*, in Brazil. *Int. J. Primatol.* **2017**, *38*, 1017–1031, doi:10.1007/s10764-017-9994-5.
27. Deane, L.M. Simian malaria in Brazil. *Mem Inst Oswaldo Cruz, Rio Janeiro* **1992**, *87*, 1–20.
28. Alvarenga, D.A.M.; Pina-Costa, A.; Bianco, C.; Moreira, S.B.; Brasil, P.; Pissinatti, A.; Daniel-Ribeiro, C.T.; Brito, C.F.A. New potential *Plasmodium brasilianum* hosts: Tamarin and marmoset monkeys (family

- Callitrichidae). *Malar. J.* **2017**, *16*, 1–7, doi:10.1186/s12936-017-1724-0.
29. Erkeniswick, G.A.; Watsa, M.; Pacheco, M.A.; Escalante, A.A.; Parker, P.G. Chronic *Plasmodium brasilianum* infections in wild Peruvian tamarins. *PLoS One* **2017**, *12*, doi:10.1371/journal.pone.0184504.
  30. Rondón, S.; León, C.; Link, A.; González, C. Prevalence of *Plasmodium* parasites in non-human primates and mosquitoes in areas with different degrees of fragmentation in Colombia. *Malar. J.* **2019**, *18*, 1–10, doi:10.1186/s12936-019-2910-z.
  31. De Abreu, F.V.S.; Gomes, L.R.; Mello, A.R.L.; Bianco-Júnior, C.; De Pina-Costa, A.; Dos Santos, E.; Teixeira, D.S.; Brasil, P.; Daniel-Ribeiro, C.T.; Lourenço-De-Oliveira, R.; et al. Frozen blood clots can be used for the diagnosis of distinct *Plasmodium* species in man and non-human primates from the Brazilian Atlantic Forest. *Malar. J.* **2018**, *17*, 1–5, doi:10.1186/s12936-018-2485-0.
  32. Brasil, P.; Zalis, M.G.; de Pina-Costa, A.; Siqueira, A.M.; Júnior, C.B.; Silva, S.; Areas, A.L.L.; Pelajo-Machado, M.; de Alvarenga, D.A.M.; da Silva Santelli, A.C.F.; et al. Outbreak of human malaria caused by *Plasmodium simium* in the Atlantic Forest in Rio de Janeiro: a molecular epidemiological investigation. *Lancet Glob. Heal.* **2017**, *5*, e1038–e1046, doi:10.1016/S2214-109X(17)30333-9.
  33. De Alvarenga, D.A.M.; Culleton, R.; De Pina-Costa, A.; Rodrigues, D.F.; Bianco, C.; Silva, S.; Nunes, A.J.D.; De Souza, J.C.; Hirano, Z.M.B.; Moreira, S.B.; et al. An assay for the identification of *Plasmodium simium* infection for diagnosis of zoonotic malaria in the Brazilian Atlantic Forest. *Sci. Rep.* **2018**, *8*, doi:10.1038/s41598-017-18216-x.
  34. da Fonseca, F. *Plasmodium* of a primate of Brazil. *Mem. Inst. Oswaldo Cruz* **1951**, *49*.
  35. Buery, J.C.; Rodrigues, P.T.; Natal, L.; Salla, L.C.; Loss, A.C.; Vicente, C.R.; Rezende, H.R.; Duarte, A.M.R.D.C.; Fux, B.; Malafronte, R.D.S.; et al. Mitochondrial genome of *Plasmodium vivax/simium* detected in an endemic region for malaria in the Atlantic Forest of Espírito Santo state, Brazil: Do mosquitoes, simians and humans harbour the same parasite? *Malar. J.* **2017**, *16*, doi:10.1186/s12936-017-2080-9.
  36. Santana, C.H.; de Oliveira, A.R.; dos Santos, D.O.; Pimentel, S.P.; de Souza, L. dos R.; Moreira, L.G.A.; Braz, H.M.B.; de Carvalho, T.P.; Lopes, C.E.B.; Oliveira, J.B.S.; et al. Genotyping of *Toxoplasma gondii* in a lethal toxoplasmosis outbreak affecting captive howler monkeys (*Alouatta* sp.). *J. Med. Primatol.* **2020**, doi:10.1111/jmp.12506.
  37. Oh, H.; Eo, K.Y.; Gumber, S.; Hong, J.J.; Kim, C.Y.; Lee, H.H.; Jung, Y.M.; Kim, J.; Whang, G.W.; Lee, J.M.; et al. An outbreak of toxoplasmosis in squirrel monkeys (*Saimiri sciureus*) in South Korea. *J. Med. Primatol.* **2018**, *47*, 238–246, doi:10.1111/jmp.12344.
  38. Nishimura, M.; Goyama, T.; Tomikawa, S.; Fereig, R.M.; El-Alfy, E.S.N.; Nagamune, K.; Kobayashi, Y.; Nishikawa, Y. Outbreak of toxoplasmosis in four squirrel monkeys (*Saimiri sciureus*) in Japan. *Parasitol. Int.* **2019**, *68*, 79–86, doi:10.1016/j.parint.2018.10.008.
  39. dos Santos, C.S.; de Jesus, V.L.T.; McIntosh, D.; Carreiro, C.C.; Batista, L.C.O.; do Bomfim Lopes, B.; Neves, D.M.; Lopes, C.W.G. Morphological, ultrastructural, and molecular characterization of intestinal tetratrichomonads isolated from non-human primates in southeastern Brazil. *Parasitol. Res.* **2017**, *116*, 2479–2488, doi:10.1007/s00436-017-5552-5.
  40. Aysanoa, E.; Mayor, P.; Mendoza, A.P.; Zariquiey, C.M.; Morales, E.A.; Pérez, J.G.; Bowler, M.; Ventocilla, J.A.; González, C.; Baldeviano, G.C.; et al. Molecular Epidemiology of Trypanosomatids and *Trypanosoma cruzi* in Primates from Peru. *Ecohealth* **2017**, *14*, 732–742, doi:10.1007/s10393-017-1271-8.
  41. Medkour, H.; Davoust, B.; Levasseur, A.; Mediannikov, O. Molecular Evidence of *Leishmania infantum* and *Leishmania guyanensis* in Red Howler Monkey (*Alouatta seniculus*) from French Guiana. *Vector-Borne Zoonotic Dis.* **2019**, *19*, 896–900, doi:10.1089/vbz.2019.2459.



42. Porfirio, G.E. de O.; Santos, F.M.; de Macedo, G.C.; Barreto, W.T.G.; Campos, J.B.V.; Meyers, A.C.; André, M.R.; Perles, L.; de Oliveira, C.E.; Xavier, S.C. das C.; et al. Maintenance of *Trypanosoma cruzi*, *T. evansi* and *Leishmania* spp. by domestic dogs and wild mammals in a rural settlement in Brazil-Bolivian border. *Int. J. Parasitol. Parasites Wildl.* **2018**, *7*, 398–404, doi:10.1016/j.ijppaw.2018.10.004.
43. Martínez, M.F.; Kowalewski, M.M.; Giuliani, M.G.; Acardi, S.A.; Salomón, O.D. Molecular identification of *Leishmania* in free-ranging black and gold howler monkeys (*Alouatta caraya*) in northeastern Argentina. *Acta Trop.* **2020**, *210*, doi:10.1016/j.actatropica.2020.105534.
44. Herrer, A.; Christensen, H.; Beumer, R. Reservoir hosts of cutaneous leishmaniasis among Panamanian forest mammals. *Am. J. Trop. Med. Hyg.* **1973**, *22*.
45. Trüeb, I.; Portela, R.D.; Franke, C.R.; Carneiro, I.O.; Ribeiro, G.J.; Soares, R.P.; Barrouin-Melo, S.M. *Trypanosoma cruzi* and *Leishmania* sp. infection in wildlife from urban rainforest fragments in northeast Brazil. *J. Wildl. Dis.* **2018**, *54*, 76–84, doi:10.7589/2017-01-017.
46. Santos, R.; Oliveira, A. Leishmaniasis in non-human primates: Clinical and pathological manifestations and potential as reservoirs. *J. Med. Primatol.* **2020**, *49*, 34–39.
47. R, L.; JJ, S.; RR, B.; E, S.; AA, S.; FT, S. Isolation of *Leishmania* from monkeys in the Amazon region of Brazil. *Trans Roy Soc Trop Med Hyg* **1988**, *82*.
48. Dario, M.A.; Lisboa, C.V.; Costa, L.M.; Moratelli, R.; Nascimento, M.P.; Costa, L.P.; Reis Leite, Y.L.; Llewellyn, M.S.; Das Chagas Xavier, S.C.; Rodrigues Roque, A.L.; et al. High *Trypanosoma* spp. diversity is maintained by bats and triatomines in Espírito Santo state, Brazil. *PLoS One* **2017**, *12*, doi:10.1371/journal.pone.0188412.
49. Bahia, M.; de Nazaré Leite Barros, F.; Magalhães-Matos, P.C.; de Souza Gonçalves, T.; Chiesorin Neto, L.; Oliveira Faria, D.C.L.; Aparecida Romeiro, S.; Barros Monteiro, F.O.; Góes-Cavalcante, G.; Scofield, A. *Trypanosoma cruzi* infection in captive Neotropical primates in the Brazilian Amazon. *Am. J. Primatol.* **2017**, *79*, 1–6, doi:10.1002/ajp.22590.
50. Ziccardi, M.; Lourenço-De-Oliveira, R.; Nogueira, R. The Haemoculture of *Trypanosoma minasense* Chagas, 1908; Vol. 91;.
51. Schott, D.; Ribeiro, P.R.; de Souza, V.K.; Surita, L.E.; de Amorim, D.B.; Bianchi, M.V.; Anicet, M.Z.; Alievi, M.M.; Pavarini, S.P.; de Carvalho, R.W.; et al. Clinical and pathological aspects of first report of *Tunga penetrans* infestation on southern brown howler monkey (*Alouatta guariba clamitans*) in Rio Grande do Sul, Brazil. *J. Med. Primatol.* **2020**, *49*, 315–321, doi:10.1111/jmp.12491.
52. Agostini, I.; Vanderhoeven, E.; Beldomenico, P.M.; Pfoh, R.; Notarnicola, J. First coprological survey of helminths in a wild population of black capuchin monkeys (*Sapajus nigritus*) in northeastern Argentina. *Mastozool. Neotrop.* **2018**, *25*, 269–281, doi:10.31687/SAREMMN.18.25.2.0.11.
53. Martin-Solano, S.; Carrillo-Bilbao, G.A.; Ramirez, W.; Celi-Erazo, M.; Huynen, M.C.; Leveck, B.; Benitez-Ortiz, W.; Losson, B. Gastrointestinal parasites in captive and free-ranging *Cebus albifrons* in the Western Amazon, Ecuador. *Int. J. Parasitol. Parasites Wildl.* **2017**, *6*, 209–218, doi:10.1016/j.ijppaw.2017.06.004.
54. Erkeniswick, G.A.; Watsa, M.; Gozalo, A.S.; Dudaie, S.; Bailey, L.; Muranda, K.S.; Kuziez, A.; Parker, P.G. A multiyear survey of helminths from wild saddleback (*Leontocebus weddelli*) and emperor (*Saguinus imperator*) tamarins. *Am. J. Primatol.* **2019**, *81*, doi:10.1002/ajp.23063.
55. Oliveira, A.R.; Souza, T.D.; Flecher, M.C.; Gardiner, C.H.; Santos, R.L. First report of *Gongylonema* sp. in a free ranging callitrichid from the Brazilian Atlantic Forest: Case report. *Arq. Bras. Med. Vet. e Zootec.* **2019**, *71*, 777–781, doi:10.1590/1678-4162-10760.
56. Martínez-mota, R.; Gillespie, T.R.; Garber, P.A.; Palme, R. The relative effects of reproductive condition ,

stress , and seasonality on patterns of parasitism in wild female black howler monkeys (*Alouatta pigra*). **2017**, 1–12, doi:10.1002/ajp.22669.

57. Bacalhao, M.B.M.; Siqueira, R.A.S.; Nery, T.F.L.; Firmino, M. de O.; Neto, T.S. de O.; Nascimento, H.H.L.; Guerra, R.R.; Lucena, R.B. Ulcerative and granulomatous enteritis associated with *Molineus torulosus* parasitism in neotropical primates. *Pesqui. Vet. Bras.* **2016**, *36*, 1005–1008, doi:10.1590/S0100-736X2016001000014.
58. Laidoudi, Y.; Medkour, H.; Levasseur, A.; Davoust, B.; Mediannikov, O. New molecular data on filaria and its *Wolbachia* from red howler monkeys (*Alouatta macconnelli*) in French Guiana - A preliminary study. *Pathogens* **2020**, *9*, 1–23, doi:10.3390/pathogens9080626.
59. Fernandez Conga, D.; Mayor, P.; Guerreiro Giese, E.; Nascimento dos Santos, J. First report of filarial nematodes in free-living pitheciid primates. *Syst. Parasitol.* **2019**, *96*, 257–264, doi:10.1007/s11230-019-09838-y.
60. Conga, D.F.; Mayor, P.; Furtado, A.P.; Giese, E.G.; dos Santos, J.N. Occurrence of *Dipetalonema gracile* in a wild population of woolly monkey *Lagothrix poeppigii* in the northeastern Peruvian Amazon. *Rev. Bras. Parasitol. Vet.* **2018**, *27*, 154–160, doi:10.1590/S1984-296120180014.
61. Zhang, P.; Ran, R.K.; Abdullahi, A.Y.; Shi, X.L.; Huang, Y.; Sun, Y.X.; Liu, Y.Q.; Yan, X.X.; Hang, J.X.; Fu, Y.Q.; et al. The mitochondrial genome of *Dipetalonema gracile* from a squirrel monkey in China. *J. Helminthol.* **2020**, *94*, 1–8, doi:10.1017/S0022149X18000871.
62. Martínez-Mota, R.; Pozo-Montuy, G.; Bonilla Sánchez, Y.M.; Gillespie, T.R. Effects of anthropogenic stress on the presence of parasites in a threatened population of black howler monkeys (*Alouatta pigra*). *Therya* **2018**, *9*, 161–170, doi:10.12933/therya-18-572.
63. Costa, T.S.O.; Nogueira-Filho, S.L.G.; De Vleeschouwer, K.M.; Oliveira, L.C.; de Sousa, M.B.C.; Mendl, M.; Catenacci, L.S.; Nogueira, S.S.C. Individual behavioral differences and health of golden-headed lion tamarins (*Leontopithecus chrysomelas*). *Am. J. Primatol.* **2020**, doi:10.1002/ajp.23118.
64. Solórzano García, B.; Melin, A.D.; Aureli, F.; Pérez Ponce De León, G. Unveiling patterns of genetic variation in parasite-host associations: An example with pinworms and Neotropical primates. *Parasitology* **2019**, *146*, 356–362, doi:10.1017/S0031182018001749.
65. Solórzano-García, B.; Gasca-Pineda, J.; Poulin, R.; Pérez-Ponce de León, G. Lack of genetic structure in pinworm populations from New World primates in forest fragments. *Int. J. Parasitol.* **2017**, *47*, 941–950, doi:10.1016/j.ijpara.2017.06.008.
66. Pereira, F. V.; Lucena, F.P.; Rodrigues, R.L.; Barros, L.A.; Pires, C.A.; Ferreira, A.M.R.; Mello, M.F.V. Prevalence and spatial distribution of the occurrence of helminths in free-living nonhuman primates in the State of Rio de Janeiro, Brazil. *Arq. Bras. Med. Vet. e Zootec.* **2020**, *72*, 1705–1712, doi:10.1590/1678-4162-11868.
67. Solórzano-García, B.; Ospina, A.L.; Rondón, S.; Pérez-Ponce de León, G. Pinworms of the red howler monkey (*Alouatta seniculus*) in Colombia: Gathering the pieces of the pinworm-primate puzzle. *Int. J. Parasitol. Parasites Wildl.* **2020**, *11*, 17–28, doi:10.1016/j.ijppaw.2019.11.007.
68. Barbosa, A. da S.; Dib, L.V.; Uchôa, C.M.A.; Bastos, O.M.P.; Pissinatti, A. *Trypanoxyuris* (*Trypanoxyuris*) *minutus* (Schneider, 1866) among *Alouatta guariba clamitans* (Cabrera, 1940) in the state of Rio de Janeiro, Brazil. *J. Med. Primatol.* **2017**, *46*, 101–105, doi:10.1111/jmp.12265.
69. Balsiger, A.; Federer, K.; Grimm, F.; Deplazes, P. Transmission of *Pterygodermatites nycticebi* in a colony of goeldi's monkeys (*Callimico goeldii*) and evaluation of treatment and control. *J. Zoo Wildl. Med.* **2018**, *49*, 893–901, doi:10.1638/2017-0177.1.

70. Rivero, M.R.; Feliziani, C.; De Angelo, C.; Tiranti, K.; Salomon, O.D.; Touz, M.C. *Giardia* spp., the most ubiquitous protozoan parasite in Argentina: human, animal and environmental surveys reported in the last 40 years. *Parasitol. Res.* 2020, *119*, 3181–3201.
71. Manuel Tantaleán, V.; Nofre Sánchez, P.; Perea, C.M. Natural infection by *Strongyloides stercoralis* in *Pithecia monachus* (Primates, Pitheciidae). First report in Peru. *Rev. Investig. Vet. del Peru* **2018**, *29*, 1386–1390, doi:10.15381/rivep.v29i4.15197.
72. de Oliveira, A.R.; Hiura, E.; Guião-Leite, F.L.; Flecher, M.C.; Braga, F.R.; Silva, L.P.C.; Sena, T.; de Souza, T.D. Pathological and parasitological characterization of *Prosthenorchis elegans* in a free-ranging marmoset *Callithrix geoffroyi* from the Brazilian Atlantic Forest. *Pesqui. Vet. Bras.* **2017**, *37*, 1514–1518, doi:10.1590/S0100-736X2017001200025.
73. Kane, J.; Smith, R.L. *Bertiella* sp. (Meyner, 1895) infection of *Alouatta caraya* (Humboldt, 1812) in urban and natural environments in Ñeembucú, southwest Paraguay. *Am. J. Primatol.* **2020**, doi:10.1002/ajp.23166.
74. Montalbano Di Filippo, M.; Meoli, R.; Cavallero, S.; Eleni, C.; De Liberato, C.; Berrilli, F. Molecular identification of *Mesocestoides* sp. metacestodes in a captive gold-handed tamarin (*Saguinus midas*). *Infect. Genet. Evol.* **2018**, *65*, 399–405, doi:10.1016/j.meegid.2018.08.008.
75. Pinto, H.A.; Mati, V.L.T.; Pujoni, D.G.F.; Melo, A.L. *Platynosomum illiciens* (Trematoda: Dicrocoeliidae) in captive blacktufted marmoset *Callithrix penicillata* (Primates: Cebidae) from Brazil: A morphometric analyses with taxonomic comments on species of *Platynosomum* from non human primates. *J. Parasitol.* **2017**, *103*, 14–21, doi:10.1645/16-1.
76. Mati, V.L.T.; Pinto, H.A.; de Melo, A.L. Treatment of primate platynosomosis: A word of caution about the use of praziquantel in marmosets. *J. Med. Primatol.* **2021**, *50*, 60–66, doi:10.1111/jmp.12503.
77. Martins, T.F.; Milanelo, L.; Krawczak, F. da S.; Furuya, H.R.; Fitorra, L.S.; das Dores, F.T.; Pedro, V. da S.; Hippolito, A.G.; Labruna, M.B. Diversity of ticks in the wildlife screening center of São Paulo city, Brazil. *Cienc. Rural* **2017**, *47*, doi:10.1590/0103-8478cr20161052.
78. Martins, T.; Hermes, L.; Muñoz-Leal, S.; Ramirez, D.; Milanelo, L.; Marques, S.; Sanches, T.; Onofrio, V.; da C.L. Acosta, I.; Benatti, H.; et al. A new species of *Amblyomma* (Acari: Ixodidae) associated with monkeys and passerines of the Atlantic rainforest biome, Southeastern Brazil. *Ticks Tick. Borne. Dis.* **2019**, *10*, doi:10.1016/j.ttbdis.2019.07.003.
79. Martins, T.F.; Teixeira, R.H.F.; Labruna, M.B. Occurrence of ticks on wild animals received and attended at the Parque Zoológico Municipal Quinzinho de Barros, Sorocaba, São Paulo, Brazil. *Brazilian J. Vet. Res. Anim. Sci.* **2015**, *52*, 319–324, doi:10.11606/issn.1678-4456.v52i4p319-324.
80. Zimmermann, N.P.; Aguirre, A. de A.R.; Rodrigues, V. da S.; Garcia, M.V.; Medeiros, J.F.; Blecha, I.M.Z.; Duarte, P.O.; Cruz, B.C.; Cunha, R.C.; Martins, T.F.; et al. Wildlife species, Ixodid fauna and new host records for ticks in an Amazon forest area, Rondônia, Brazil. *Rev. Bras. Parasitol. Vet.* **2018**, *27*, 177–182, doi:10.1590/S1984-296120180022.
81. Roncancio, N.; Santa, M.A.; Calderón, L.M.; Gómez, E.N.; Acosta, A.; García, L.M.; Henao, B.E.; Peñuela, S.M.; Pinilla, E.A.; Poches, R.A.; et al. Differences in the prevalence of cutaneous myiasis between *Aotus vociferans* and *Aotus nancymae* in the Colombian Amazon. *Neotrop. Primates* **2018**, *24*, 86–90.
82. Do Nascimento, R.M.; Maturano, R.; De Oliveira, M.; Daemon, E. First record of *Cebidicola semiarmatus* (Phthiraptera: Trichodectidae) on the red howler monkey, *Alouatta guariba clamitans* (primate: Atelidae) in Brazil. *Rev. Colomb. Entomol.* **2018**, *44*, 129–131, doi:10.25100/socolen.v44i1.6550.
